# Supplementary material for: Recyclable EGaIn/TPU sheath–core fibres for superelastic electronics and sensing applications
Source: Royal Society of Chemistry journal article supplement (doi:10.1039/d3tc02393a), 2023-01-01
Supplement: d3tc02393a1.pdf [file d3tc02393a1.pdf]

## Electronic Supplementary Information (ESI) for Recyclable EGIn/TPU sheath–core fibres for superelastic electronics and sensing applications

Ziqi Wen,<sup>ab</sup> Jingyu Zhou,<sup>ab</sup> Shanshan Zhao,<sup>ab</sup> Shangbi Chen,<sup>abcd</sup> Dawei Zhang,<sup>ab</sup> Bin Sheng<sup>\*ab</sup>

<sup>a</sup>. School of Optical Electrical and Computer Engineering, University of Shanghai for Science and Technology, Shanghai 200093, China.

<sup>b</sup>. Shanghai Key Laboratory of Modern Optical Systems, Engineering Research Center of Optical Instruments and Systems, Shanghai 200093, China.

<sup>c</sup>. Shanghai Aerospace Control Technology Institute, Shanghai, 200233, China.

<sup>d</sup>. Shanghai Xin Yue Lian Hui Electronic Technology Co. LTD, Shanghai, 200233, China.

\*Corresponding Author.

E-mail address: bsheng@usst.edu.cn. (B. Sheng).

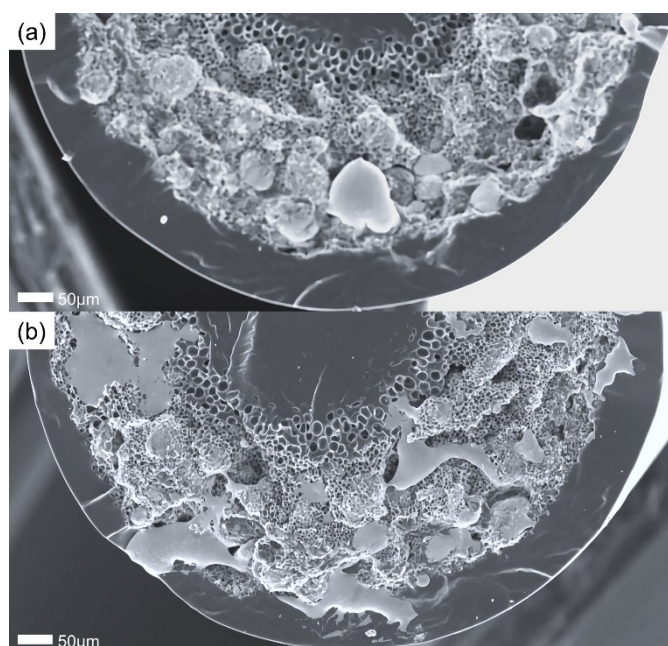

Figure S1. Enlarged SEM images of the partial cross-section of the (a) initial insulated TET fibre and (b) the conductive TET fibre after mechanical sintering.

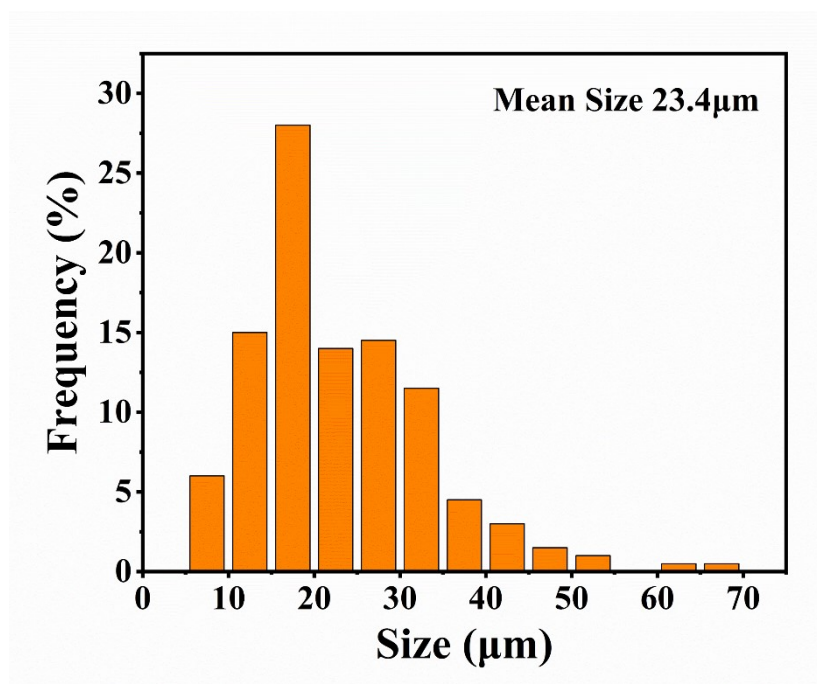

Figure S2. Distribution of the particle size of EGaIn in TET fibre, the average particle size is 23.4 $\mu$ m.

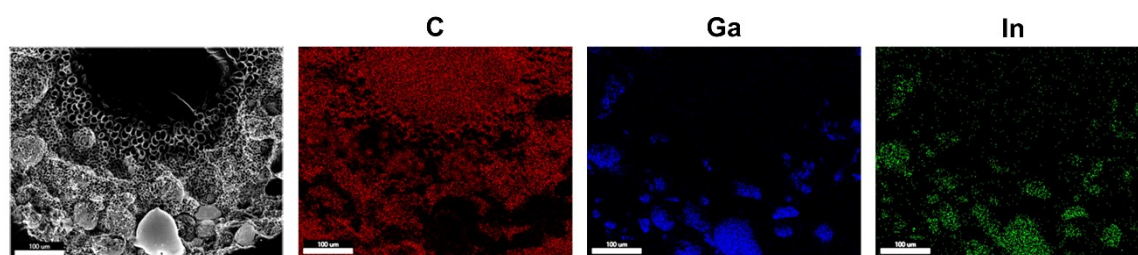

Figure S3. EDS images of partial cross-section.

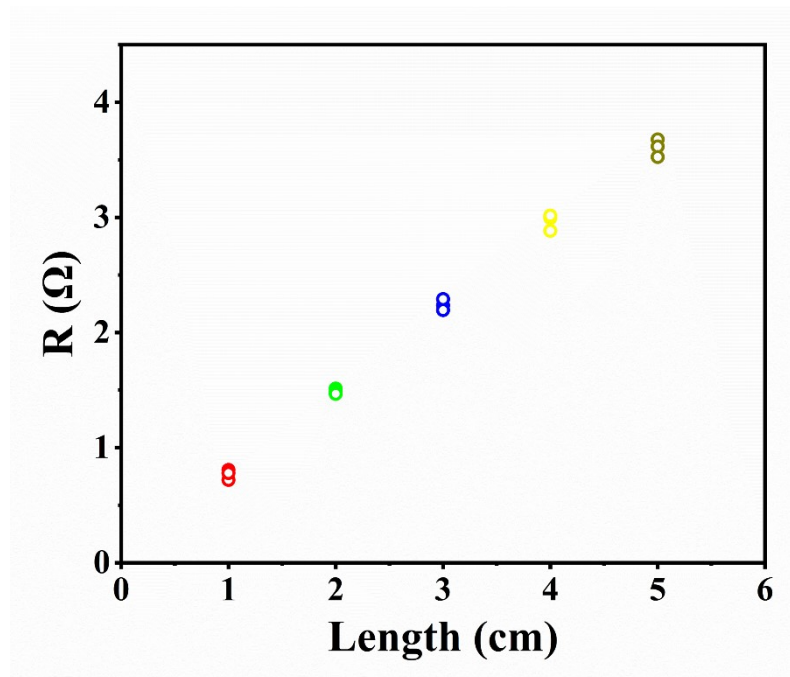

Figure S4. Resistance of TET fibres as a function of length, three samples were measured in each length.

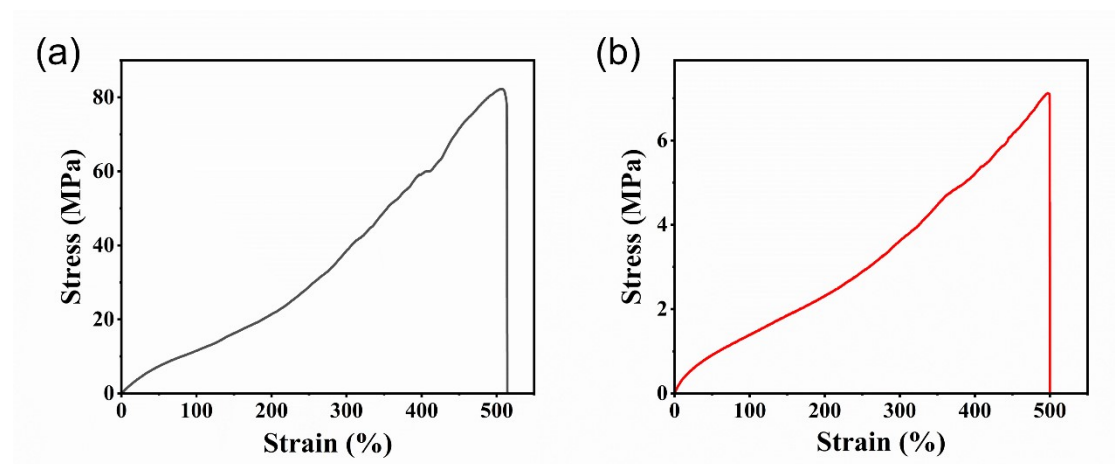

Figure S5. Stress-strain curves of TPU wire(a), TET fibre(b).

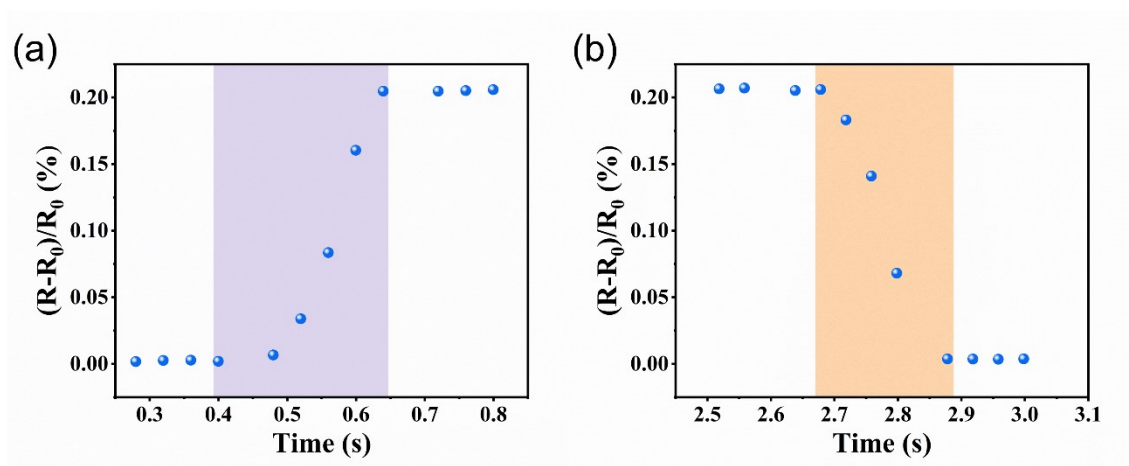

Figure S6. Partial enlargement of the response and recovery time of TET fibre at 1% strain. (a) Response time is approximately 240 ms. (b) Recovery time is approximately 200 ms.

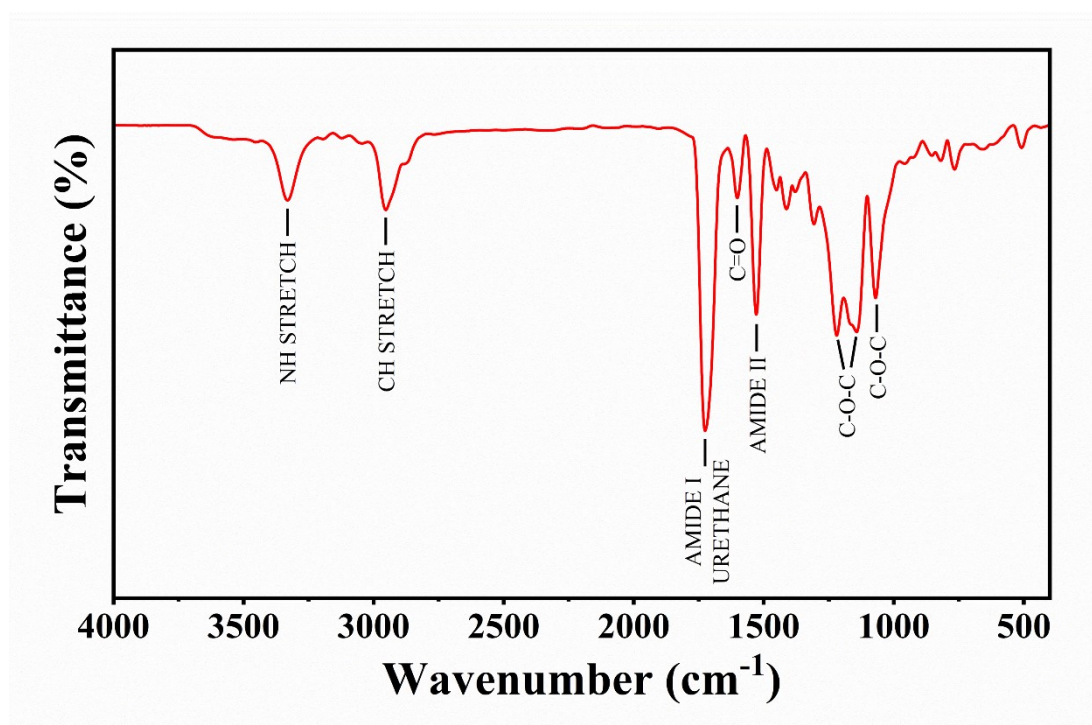

Figure S7. The ATR-FTIR transmission curves of the TPU wire.

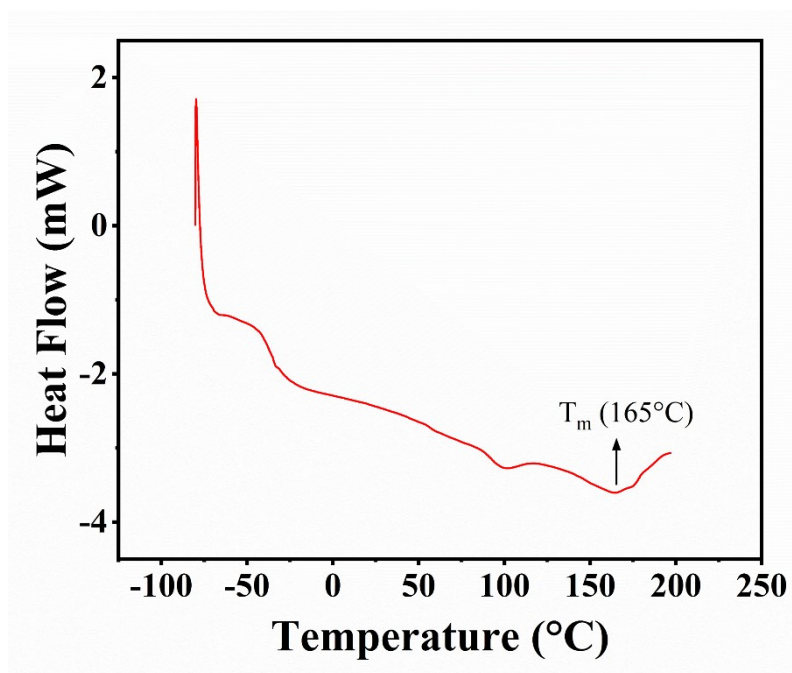

Figure S8. DSC curve of the TPU wire. The melting point of the TPU wire used in this work is 165°C.

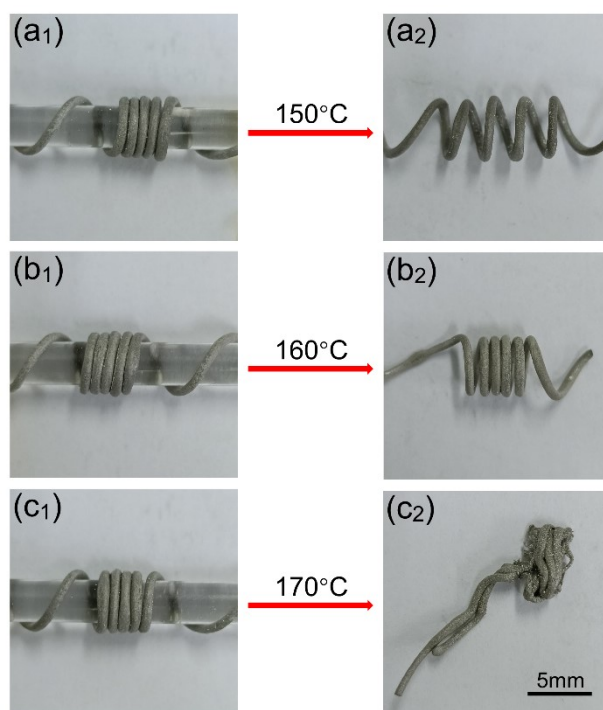

Figure S9. Photographs of TET fibres (a1-a2) before and after thermoforming at a temperature of 150°C. (b1-b2) Before and after thermoforming at 160°C. (c1-c2) Before and after thermoforming at 170°C.

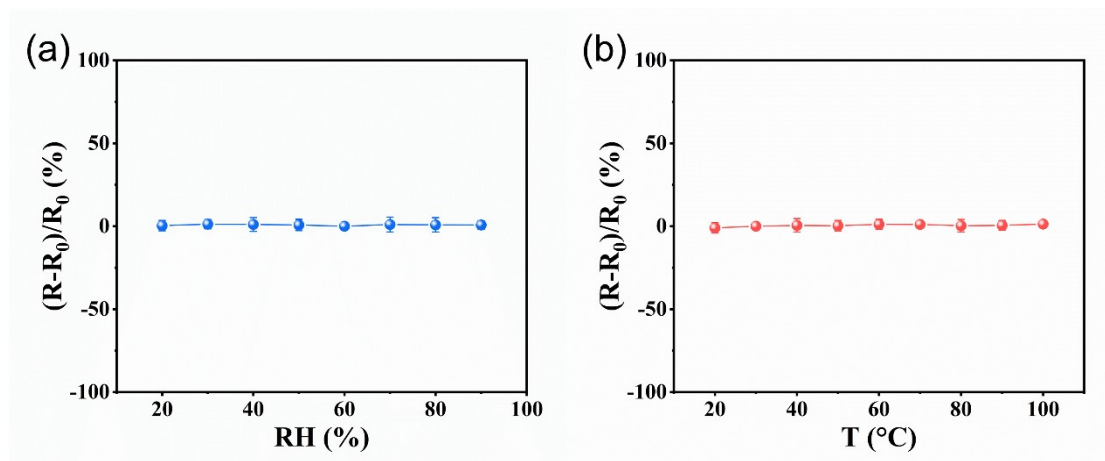

Figure S10. Relative resistance changes of TET fibre under the (a) wide temperature and (b) high humidity ranges.

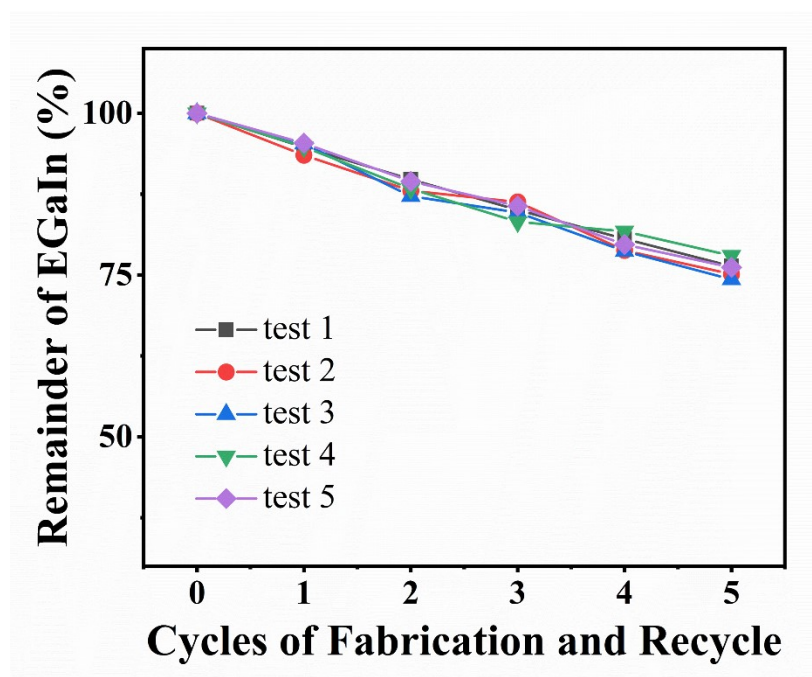

Figure S11. Detailed data of the five cycles of fabrication-recycle.



**Table S1. Detailed data of the particle size distribution of EGaIn in TET fibre.**

| Diameter ( $\mu\text{m}$ ) | Frequency (%) | Diameter ( $\mu\text{m}$ ) | Frequency (%) |
|----------------------------|---------------|----------------------------|---------------|
| 5-10                       | 6             | 35-40                      | 4.5           |
| 10-15                      | 15            | 40-45                      | 3             |
| 15-20                      | 28            | 45-50                      | 1.5           |
| 20-25                      | 14            | 50-55                      | 1             |
| 25-30                      | 14.5          | 60-65                      | 0.5           |
| 30-35                      | 11.5          | 65-70                      | 0.5           |

**Table S2. Detailed information of reports compared with this work.**

| Devices                         | Strain (%) | Q     | References |
|---------------------------------|------------|-------|------------|
| a 3D helical Cu/PU fibre        | 100        | 10000 | 66         |
| a coiled CNT/nylon fibre        | 150        | 0.1   | 63         |
| a LM sheath-core fibre          | 200        | 50    | 59         |
| a coiled CNT/rubber fibre       | 400        | 1.8   | 62         |
| Helical copper nanowire         | 700        | 1.8   | 64         |
| a buckled CNT/SEBS fibre        | 800        | 65.1  | 36         |
| a supercoiled spandex@CNT fibre | 1000       | 238   | 69         |
| Hierarchical CNT/rubber fibres  | 1320       | 264   | 68         |
| a Ag Nanoparticle/PDMS fibre    | 1536       | 30.7  | 65         |
| a biomimetic PE/AgNW Tendril    | 2000       | 271.4 | 61         |
